# Supplementary material for: Molecular Cues for Phenological Events in the Flowering Cycle in Avocado
Source: MDPI journal article supplement (doi:10.3390/plants12122304), 2023-06-13
Supplement: s1 [file s1]

## Supplementary Tables

**Table S1:** *FT*-related transcripts details used for alignment and phylogenetic tree.

| No. | Name    | Organism                    | Seq detail                     |
|-----|---------|-----------------------------|--------------------------------|
| 1   | AtFT    | <i>Arabidopsis thaliana</i> | <a href="#">AT1G65480</a>      |
| 2   | MsFT    | <i>Medicago sativa</i>      | <a href="#">AEO16612.1</a>     |
| 3   | ZjFT    | <i>Ziziphus jujuba</i>      | <a href="#">ANG60748.1</a>     |
| 4   | VvFT    | <i>Vitis vinifera</i>       | <a href="#">ABI99465.1</a>     |
| 5   | BnFT    | <i>Brassica napus</i>       | <a href="#">ACY03405.1</a>     |
| 6   | RcFT    | <i>Rosa chinensis</i>       | <a href="#">CBY25182.1</a>     |
| 7   | PmFT    | <i>Prunus mume</i>          | <a href="#">CBY25181.1</a>     |
| 8   | GmFT    | <i>Glycine max</i>          | <a href="#">ABZ80360.1</a>     |
| 9   | TaeFT   | <i>Triticum aestivum</i>    | <a href="#">ACA25439.1</a>     |
| 10  | JcFT    | <i>Jatropha curcas</i>      | <a href="#">AID51385.1</a>     |
| 11  | MiFT    | <i>Mangifera indica</i>     | <a href="#">AGA19021.1</a>     |
| 12  | StFT    | <i>Solanum tuberosum</i>    | <a href="#">NP_001274897.1</a> |
| 13  | MdFT    | <i>Malus domestica</i>      | <a href="#">ABF84010.1</a>     |
| 14  | PaFT    | <i>Persea americana</i>     | <a href="#">AIG92770.1</a>     |
| 15  | PnFT    | <i>Populus nigra</i>        | <a href="#">BAG12904.1</a>     |
| 16  | AaFT    | <i>Arabis alpina</i>        | <a href="#">KFK30313.1</a>     |
| 17  | CsFT    | <i>Camellia sinensis</i>    | <a href="#">BAM83573.1</a>     |
| 18  | CuFT    | <i>Citrus unshiu</i>        | <a href="#">BAF96645.1</a>     |
| 19  | BnTFL1  | <i>Brassica napus</i>       | <a href="#">ATQ37956.1</a>     |
| 20  | MdTFL1  | <i>Malus domestica</i>      | <a href="#">ACD69429.1</a>     |
| 21  | AhTFL1  | <i>Arachis hypogaea</i>     | <a href="#">AFP33421.1</a>     |
| 22  | MtTFL1  | <i>Medicago truncatula</i>  | <a href="#">KEH17361.1</a>     |
| 23  | CiTFL1  | <i>Citrus limon</i>         | <a href="#">AWW25018.1</a>     |
| 24  | AtTFL1  | <i>Arabidopsis thaliana</i> | <a href="#">ANS12868.1</a>     |
| 25  | PpeTFL1 | <i>Prunus persica</i>       | <a href="#">ADL62867.1</a>     |
| 26  | MiTFL1  | <i>Mangifera indica</i>     | <a href="#">AGA19026.1</a>     |

|    |         |                             |                                |
|----|---------|-----------------------------|--------------------------------|
| 27 | PnTFL1  | <i>Populus nigra</i>        | <a href="#">BAG12897.1</a>     |
| 28 | AtCEN   | <i>Arabidopsis thaliana</i> | <a href="#">AT2G27550</a>      |
| 29 | TcCEN   | <i>Theobroma cacao</i>      | <a href="#">EOY33468.1</a>     |
| 30 | AmCEN   | <i>Antirrhinum majus</i>    | <a href="#">CAC21564.1</a>     |
| 31 | HvCEN   | <i>Hordeum vulgare</i>      | <a href="#">AFV67450.1</a>     |
| 32 | MdCEN2  | <i>Malus domestica</i>      | <a href="#">P_001280813.1</a>  |
| 33 | MdCEN1  | <i>Malus domestica</i>      | <a href="#">BAG31958.1</a>     |
| 34 | AtMFT   | <i>Arabidopsis thaliana</i> | <a href="#">AT1G18100</a>      |
| 35 | BnMFT   | <i>Brassica napus</i>       | <a href="#">XP_013723319.1</a> |
| 36 | RcMFT   | <i>Rosa chinensis</i>       | <a href="#">XP_024169398.1</a> |
| 37 | MtMFT   | <i>Medicago truncatula</i>  | <a href="#">XP_003631075.2</a> |
| 38 | CsMFT   | <i>Citrus sinensis</i>      | <a href="#">XP_006467912.1</a> |
| 39 | ZjMFT   | <i>Ziziphus jujuba</i>      | <a href="#">XP_015886852.1</a> |
| 40 | CiMFT   | <i>Citrus limon</i>         | <a href="#">AWW25016.1</a>     |
| 41 | AhMFT   | <i>Arachis hypogaea</i>     | <a href="#">XP_025639284.1</a> |
| 42 | SiMFT   | <i>Solanum lycopersicum</i> | <a href="#">XP_004235817.1</a> |
| 43 | JcMFT.2 | <i>Jatropha curcas</i>      | <a href="#">AID51395.1</a>     |
| 44 | JcMFT.1 | <i>Jatropha curcas</i>      | <a href="#">AHG97810.1</a>     |
| 45 | TaeMFT  | <i>Triticum aestivum</i>    | <a href="#">BAK78909.1</a>     |
| 46 | AtBFT   | <i>Arabidopsis thaliana</i> | <a href="#">AT5G62040.1</a>    |
| 47 | CiBFT   | <i>Citrus limon</i>         | <a href="#">AWW25017.1</a>     |
| 48 | BnBFT   | <i>Brassica napus</i>       | <a href="#">XP_013723459.1</a> |
| 49 | MdMFTb  | <i>Malus domestica</i>      | <a href="#">AGX15187.1</a>     |

**Supplementary Table S2:** MADS-box (AP1, SEP, SOC1, SVP/DAM) related transcripts details used for alignment and phylogenetic tree.

| No. | Name        | Species                     | Sequence details               |
|-----|-------------|-----------------------------|--------------------------------|
| 1   | AtAP1       | <i>Arabidopsis thaliana</i> | <a href="#">AT1G69120.1</a>    |
| 2   | MiAP1       | <i>Mangifera indica</i>     | <a href="#">ACS45103.1</a>     |
| 3   | PtAP1.1     | <i>Populus trichocarpa</i>  | <a href="#">AAT39554.1</a>     |
| 4   | StAP1       | <i>Solanum tuberosum</i>    | <a href="#">ADA77531.1</a>     |
| 5   | MdAP1       | <i>Malus domestica</i>      | <a href="#">ACD69426.1</a>     |
| 6   | VuAP1       | <i>Vigna unguiculata</i>    | <a href="#">BAJ22385.1</a>     |
| 7   | NnAP1       | <i>Nelumbo nucifera</i>     | <a href="#">AGY54940.1</a>     |
| 8   | JcAP1       | <i>Jatropha curcas</i>      | <a href="#">AKM16736.1</a>     |
| 9   | VvAP1       | <i>Vitis vinifera</i>       | <a href="#">NP_001268210.1</a> |
| 10  | CsAP1       | <i>Citrus sinensis</i>      | <a href="#">NP_001275828.1</a> |
| 11  | PaAP1       | <i>Persea americana</i>     | <a href="#">ABD62862.1</a>     |
| 12  | AtFUL       | <i>Arabidopsis thaliana</i> | <a href="#">AT5G60910.1</a>    |
| 13  | VvFUL       | <i>Vitis vinifera</i>       | <a href="#">ACZ26529.1</a>     |
| 14  | AtSOC1      | <i>Arabidopsis thaliana</i> | <a href="#">AT2G45660.1</a>    |
| 15  | PtSOC1      | <i>Populus trichocarpa</i>  | <a href="#">XP_006383341.2</a> |
| 16  | NtSOC1-like | <i>Nicotiana tabacum</i>    | <a href="#">NP_001312958.1</a> |
| 17  | MdSOC1-like | <i>Malus domestica</i>      | <a href="#">NP_001280844.1</a> |
| 18  | PmSOC1-like | <i>Prunus mume</i>          | <a href="#">NP_001306730.1</a> |
| 19  | GmSOC1      | <i>Glycine max</i>          | <a href="#">ABC75835.1</a>     |
| 20  | AaSOC1      | <i>Arabis alpina</i>        | <a href="#">AEH43355.1</a>     |
| 21  | CsiSOC1     | <i>Camellia sinensis</i>    | <a href="#">ALS54681.1</a>     |
| 22  | MiSCO1      | <i>Mangifera indica</i>     | <a href="#">ADX97324.1</a>     |
| 23  | ParSOC1     | <i>Prunus armeniaca</i>     | <a href="#">AGD88524.1</a>     |
| 24  | EgrSOC1     | <i>Eucalyptus grandis</i>   | <a href="#">XP_018716234.1</a> |
| 25  | AtSVP       | <i>Arabidopsis thaliana</i> | <a href="#">AT2G22540.1</a>    |

|    |         |                             |                                |
|----|---------|-----------------------------|--------------------------------|
| 26 | BnSVP   | <i>Brassica napus</i>       | <a href="#">AFM77910.1</a>     |
| 27 | JcSVP   | <i>Jatropha curcas</i>      | <a href="#">XP_012081656.1</a> |
| 28 | CpSVP   | <i>Carica papaya</i>        | <a href="#">XP_021897605.1</a> |
| 29 | CsSVP   | <i>Citrus sinensis</i>      | <a href="#">XP_006472471.1</a> |
| 30 | PmSVP   | <i>Prunus mume</i>          | <a href="#">NP_001313437.1</a> |
| 31 | AaSVP   | <i>Arabis alpina</i>        | <a href="#">KFK32803.1</a>     |
| 32 | GmSVP   | <i>Glycine max</i>          | <a href="#">NP_001240951.1</a> |
| 33 | PpDAM1  | <i>Prunus persica</i>       | <a href="#">ABJ96361.2</a>     |
| 34 | MdDAM2  | <i>Malus domestica</i>      | <a href="#">AOA32866.1</a>     |
| 35 | MdDAM1  | <i>Malus domestica</i>      | <a href="#">AOA32865.1</a>     |
| 36 | PmDAM1  | <i>Prunus mume</i>          | <a href="#">BAK78921.1</a>     |
| 37 | PmDAM2  | <i>Prunus mume</i>          | <a href="#">BAK78922.1</a>     |
| 38 | AtSEP2  | <i>Arabidopsis thaliana</i> | <a href="#">AT3G02310.1</a>    |
| 39 | AtSEP1  | <i>Arabidopsis thaliana</i> | <a href="#">AT5G15800.2</a>    |
| 40 | AtSEP3  | <i>Arabidopsis thaliana</i> | <a href="#">AT1G24260.2</a>    |
| 41 | AtSEP4  | <i>Arabidopsis thaliana</i> | <a href="#">AT2G03710.1</a>    |
| 42 | BnSEP1  | <i>Brassica napus</i>       | <a href="#">XP_013720978.1</a> |
| 43 | PtSEP2  | <i>Populus trichocarpa</i>  | <a href="#">XP_024444692.1</a> |
| 44 | CsSEP1  | <i>Citrus sinensis</i>      | <a href="#">XP_006482430.1</a> |
| 45 | ZjSEP1  | <i>Ziziphus jujuba</i>      | <a href="#">XP_024928213.1</a> |
| 46 | ZjSEP3  | <i>Ziziphus jujuba</i>      | <a href="#">XP_024928665.1</a> |
| 47 | AaSEP3  | <i>Arabis alpina</i>        | <a href="#">KFK44483.1</a>     |
| 48 | MdSEP1  | <i>Malus domestica</i>      | <a href="#">NP_001280893.1</a> |
| 49 | EgrSEP1 | <i>Eucalyptus grandis</i>   | <a href="#">NP_001289642.1</a> |

**Table S3: CO-related transcripts details used for alignment and phylogenetic tree.**

|    | Name   | Species                     | Seq. detail                    |
|----|--------|-----------------------------|--------------------------------|
| 1  | StCO   | <i>Solanum tuberosum</i>    | <a href="#">NP_001274795.1</a> |
| 2  | AtCO   | <i>Arabidopsis thaliana</i> | <a href="#">AT5G15840.1</a>    |
| 3  | SlCO2  | <i>Solanum lycopersicum</i> | <a href="#">AAS67378.1</a>     |
| 4  | SlCO1  | <i>Solanum lycopersicum</i> | <a href="#">AAS67377.1</a>     |
| 5  | NtCO   | <i>Nicotiana tabacum</i>    | <a href="#">AEJ84000.1</a>     |
| 6  | GmCO   | <i>Glycine max</i>          | <a href="#">ACJ65311.1</a>     |
| 7  | MiCO   | <i>Mangifera indica</i>     | <a href="#">ADX97322.1</a>     |
| 8  | PdCO2  | <i>Populus deltoides</i>    | <a href="#">AAS00055.1</a>     |
| 9  | MdCOL4 | <i>Malus domestica</i>      | <a href="#">NP_001280817.1</a> |
| 10 | MdCOL1 | <i>Malus domestica</i>      | <a href="#">AAC99309.1</a>     |
| 11 | MdCOL2 | <i>Malus domestica</i>      | <a href="#">AAC99310.1</a>     |
| 12 | MtCO1  | <i>Medicago truncatula</i>  | <a href="#">XP_013447078.1</a> |
| 13 | AtCOL5 | <i>Arabidopsis thaliana</i> | <a href="#">AT5G57660.1</a>    |
| 14 | AtCOL4 | <i>Arabidopsis thaliana</i> | <a href="#">AT5G24930.1</a>    |
| 15 | AtCOL1 | <i>Arabidopsis thaliana</i> | <a href="#">AT5G15850.1</a>    |
| 16 | AtCOL2 | <i>Arabidopsis thaliana</i> | <a href="#">AT3G02380.1</a>    |
| 17 | AtCOL3 | <i>Arabidopsis thaliana</i> | <a href="#">AT2G24790.1</a>    |

**Supplementary Table S4: New gene transcript identified from in-house transcriptome/genome data.** Full length Coding region of these transcripts were predicted using Geneious software and were then submitted to NCBI repository. The integrity of each transcript's protein domain was validated using phmmr online prediction tool.

| Gene             | NCBI submission             | phmmr (pfam.xfam.org) protein domain validation results |
|------------------|-----------------------------|---------------------------------------------------------|
| <i>PaAGL4</i>    | Submitted, pending approval | SRF, K BOX                                              |
| <i>PaMFTa</i>    | Submitted, pending approval | Phosphatidylethanolamine-binding protein                |
| <i>PaMFTb</i>    | Submitted, pending approval | Phosphatidylethanolamine-binding protein                |
| <i>PaSOC1b</i>   | Submitted, pending approval | SRF, K BOX                                              |
| <i>PaFUL</i>     | Submitted, pending approval | SRF, K BOX                                              |
| <i>PaCOa</i>     | Submitted, pending approval | B-box zinc finger, CCT motif                            |
| <i>PaCOb</i>     | Submitted, pending approval | B-box zinc finger, CCT motif                            |
| <i>PaDAM</i>     | Submitted, pending approval | SRF, K BOX                                              |
| <i>PaCYCD3;1</i> | Submitted, pending approval | Cyclin, N-terminal domain and C-terminal domain         |
| <i>MciSEP3</i>   | Submitted, pending approval | SRF, K BOX                                              |
| <i>MciMFT</i>    | Submitted, pending approval | Phosphatidylethanolamine-binding protein                |
| <i>MciCOa</i>    | Submitted, pending approval | B-box zinc finger, CCT motif                            |

|                   |                        |         |                                                 |
|-------------------|------------------------|---------|-------------------------------------------------|
| <i>MciCOB</i>     | Submitted,<br>approval | pending | B-box zinc finger, CCT motif                    |
| <i>MciFT</i>      | Submitted,<br>approval | pending | Phosphatidylethanolamine-binding protein        |
| <i>MciCEN</i>     | Submitted,<br>approval | pending | Phosphatidylethanolamine-binding protein        |
| <i>MciSOC1b</i>   | Submitted,<br>approval | pending | SRF, K BOX                                      |
| <i>MciTFL</i>     | Submitted,<br>approval | pending | Phosphatidylethanolamine-binding protein        |
| <i>MciDAM</i>     | Submitted,<br>approval | pending | SRF, K BOX                                      |
| <i>MciCYCD2;1</i> | Submitted,<br>approval | pending | Cyclin, N-terminal domain and C-terminal domain |
| <i>MciFUL</i>     | Submitted,<br>approval | pending | SRF, K BOX                                      |

**Supplementary Table S5:** Primers used to amplify transcripts.

| No. | Gene             | F Primer             | R Primer               |
|-----|------------------|----------------------|------------------------|
| 1   | <i>PaAGL4</i>    | AACTACAGTCGCCAAGCTCC | TCCATCCAGGAACGAAACCG   |
| 2   | <i>PaMFTa</i>    | ATCAAGCCCTCCATTGCCCA | CGCATCCGGGTCTGTCATCA   |
| 3   | <i>PaMFTb</i>    | AGCCGGTTCCTTCTGTGCAT | TTTCAACACCCGCACGTTTCG  |
| 4   | <i>PaSOC1b</i>   | AAGCAGGCAAGTGACGTTCT | TTTCCATCCCTTGATTGGAG   |
| 5   | <i>PaFUL</i>     | CCTTCTCAAGAAAGCGAACG | TATTCGGTGAGCTTGCCTCT   |
| 6   | <i>PaCOa</i>     | TTCAGATGCCACACCAGTTC | GCATAAGCCTTCCTTGAAGC   |
| 7   | <i>PaCOb</i>     | ACGCTTTGCCAAGAGAACAG | TACAATCCCGTATCCGCTTT   |
| 8   | <i>PaDAM</i>     | CAGGTAGCAGAAAAGGGCCA | CTAGCACGCGACTTAGTCCC   |
| 9   | <i>PaCYCD3;1</i> | CAGGTAGCAGAAAAGGGCCA | CTAGCACGCGACTTAGTCCC   |
| 10  | <i>PaPP2AA3</i>  | AATTGGGGCCCAGATGAAGG | CTCTGGTGCACTTGGGTAGG   |
| 11  | <i>PaGAPDH</i>   | TGGGAAACTTACAGGAATGG | GTCACCCACAAAGTCAGTAGAA |
| 12  | <i>PaEF1a</i>    | ATCAAGCGTGGGTTTGTTC  | TACCCGTTGCCAATCTGACC   |
